# Supplementary material for: Algal symbiont genera but not coral host genotypes correlate to stony coral tissue loss disease susceptibility among Orbicella faveolata colonies in South Florida
Source: Frontiers journal article supplement (doi:10.3389/fmars.2024.1287457), 2024-01-25
Supplement: Table_2.DOCX [file Table_2.DOCX]

| **KleinID** | **Lineage** | **SCTLD** | **Lesion present during collection** | **Sample Date** | **Core Site Angle** | **Core Site Location** | **Core Site Heading** | **Core Site Depth_m** |
| --- | --- | --- | --- | --- | --- | --- | --- | --- |
| OF_001 | Lineage 2 ECA | affected | Absent | 06/17/2021 | Vertical | Lower Side | S | 7.0104 |
| OF_002 | Lineage 2 ECA | affected | Present | 06/17/2021 | Angle | Middle Side | N | 5.1816 |
| OF_003 | Lineage 1 ECA | unaffected | Absent | 05/28/2021 | Angle | Upper Side | S | 4.8768 |
| OF_004 | Lineage 1 ECA | unaffected | Absent | 05/28/2021 | Angle | Upper Side | N | 4.572 |
| OF_005 | Lineage 2 ECA | affected | Absent | 06/21/2021 | Angle | Bottom | NE | 5.1816 |
| OF_006 | Lineage 1 ECA | affected | Absent | 05/28/2021 | Angle | Middle Side | SW | 5.1816 |
| OF_007 | Lineage 2 ECA | affected | Absent | 06/17/2021 | Flat | Middle Side | N | 6.7056 |
| OF_008 | Lineage 2 ECA | affected | Absent | 06/17/2021 | Flat | Top | NE | 10.3632 |
| OF_009 | Lineage 1 ECA | affected | Absent | 05/28/2021 | Angle | Middle Side | S | 5.1816 |
| OF_010 | Lineage 1 ECA | unaffected | Absent | 05/28/2021 | Angle | Middle Side | SE | 5.4864 |
| OF_011 | Lineage 1 ECA | unaffected | Absent | 05/28/2021 | Angle | Upper Side | N | 5.4864 |
| OF_012 | Lineage 1 ECA | unaffected | Absent | 05/28/2021 | Angle | Upper Side | E | 5.4864 |
| OF_013 | Lineage 1 ECA | affected | Absent | 05/28/2021 | Angle | Upper Side | S | 5.1816 |
| OF_014 | Lineage 1 ECA | affected | Absent | 05/28/2021 | Angle | Top | NW | 4.572 |
| OF_015 | Lineage 1 ECA | affected | Absent | 05/28/2021 | Flat | Upper Side | NW | 4.572 |
| OF_016 | Lineage 1 ECA | affected | Absent | 05/28/2021 | Angle | Middle Side | N | 4.572 |
| OF_017 | Lineage 2 ECA | affected | Absent | 06/21/2021 | Angle | Middle Side | NE | 5.1816 |
| OF_018 | Lineage 1 ECA | affected | Absent | 05/28/2021 | Flat | Middle Side | W | 4.8768 |
| OF_019 | Lineage 2 ECA | affected | Absent | 06/17/2021 | Angle | Middle Side | N | 5.4864 |
| OF_020 | Lineage 2 ECA | affected | Absent | 06/21/2021 | Flat | Top | S | 5.1816 |
| OF_021 | Lineage 2 ECA | affected | Absent | 06/21/2021 | Flat | Top | N | 6.4008 |
| OF_022 | Lineage 2 ECA | affected | Absent | 06/17/2021 | Angle | Lower Side | N | 7.62 |
| OF_023 | Lineage 2 ECA | affected | Absent | 06/21/2021 | Flat | Top | NE | 5.1816 |
| OF_024 | Lineage 2 ECA | unaffected | Absent | 06/21/2021 | Angle | Upper Side | S | 6.7056 |
| OF_025 | Lineage 2 ECA | affected | Absent | 06/17/2021 | Vertical | Lower Side | E | 4.8768 |
| OF_026 | Lineage 2 ECA | affected | Absent | 06/17/2021 | Flat | Lower Side | N | 7.62 |
| OF_027 | Lineage 2 ECA | affected | Absent | 06/17/2021 | Angle | Lower Side | N | 7.3152 |
| OF_028 | Lineage 2 ECA | affected | Absent | 06/17/2021 | Vertical | Upper Side | N | 6.4008 |
| OF_029 | Lineage 2 ECA | unaffected | Absent | 06/21/2021 | Vertical | Middle Side | NW | 5.4864 |
| OF_030 | Lineage 2 ECA | unaffected | Absent | 06/21/2021 | Vertical | Middle Side | W | 5.4864 |
| OF_031 | Lineage 1 ECA | unaffected | Absent | 05/28/2021 | Flat | Top | Top | 5.1816 |
| OF_032 | Lineage 2 ECA | affected | Absent | 06/21/2021 | Vertical | Middle Side | N | 5.4864 |
| OF_033 | Lineage 2 ECA | affected | Absent | 05/28/2021 | Angle | Top/Upper Side | SW | 6.096 |
| OF_034 | Lineage 2 ECA | affected | Absent | 05/28/2021 | Vertical | Upper Side | W | 4.572 |
| OF_035 | Lineage 2 ECA | unaffected | Absent | 06/17/2021 | Angle | Upper Side | W | 8.2296 |
| OF_036 | Lineage 2 ECA | unaffected | Absent | 06/17/2021 | Angle | Top | W | 8.8392 |
| OF_037 | Lineage 2 ECA | unaffected | Absent | 06/21/2021 | Angle | Upper Side | W | 5.1816 |
| OF_038 | Lineage 2 ECA | unaffected | Absent | 06/21/2021 | Angle | Upper Side | NE | 5.4864 |
| OF_039 | Lineage 2 ECA | unaffected | Absent | 06/17/2021 | Vertical | Middle Side | W | 6.7056 |
| OF_040 | Lineage 2 ECA | affected | Absent | 06/17/2021 | Flat | Upper Side | N | 7.0104 |
| OF_041 | Lineage 2 ECA | unaffected | Absent | 06/21/2021 | Vertical | Bottom | N | 6.4008 |
| OF_042 | Lineage 2 ECA | affected | Absent | 06/17/2021 | Angle | Lower Side/Bottom | S | 6.4008 |
| OF_043 | Lineage 2 ECA | affected | Absent | 06/17/2021 | Angle | Lower Side | SE | 7.0104 |
| OF_044 | Lineage 2 ECA | affected | Absent | 06/21/2021 | Vertical | Middle Side | E | 5.1816 |
| OF_045 | Lineage 2 ECA | unaffected | Absent | 06/21/2021 | Vertical | Lower Side | E | 5.4864 |
| OF_046 | Lineage 2 Lower Keys | affected | Absent | 06/12/2021 | Vertical | Middle Side | SW | 5.4864 |
| OF_047 | Lineage 2 Lower Keys | affected | Present | 06/12/2021 | Flat | Top | S | 7.0104 |
| OF_048 | Lineage 2 Lower Keys | affected | Present | 06/12/2021 | Vertical | Middle Side | W | 4.2672 |
| OF_049 | Lineage 2 Lower Keys | affected | Present | 06/12/2021 | Vertical | Middle Side | NE | 7.0104 |
| OF_050 | Lineage 2 Lower Keys | affected | Present | 06/12/2021 | Vertical | Middle Side | SW | 5.4864 |
| OF_051 | Lineage 2 Lower Keys | affected | Present | 06/12/2021 | Angle | Top | NW | 5.7912 |
| OF_052 | Lineage 2 Lower Keys | affected | Present | 06/12/2021 | Angle | Middle Side | SW | 7.3152 |
| OF_053 | Lineage 2 Lower Keys | affected | Present | 06/12/2021 | Flat | Top | NE | 3.3528 |
| OF_054 | Lineage 2 Lower Keys | affected | Absent | 06/12/2021 | Flat | Middle Side | E | 3.6576 |
| OF_055 | Lineage 2 Lower Keys | affected | Present | 06/12/2021 | Angle | Top | SE | 6.7056 |
| OF_056 | Lineage 2 Lower Keys | affected | Present | 06/12/2021 | Flat | Top | S | 6.096 |
| OF_057 | Lineage 2 Lower Keys | affected | Present | 06/12/2021 | Flat | Top | W | 5.1816 |
| OF_058 | Lineage 2 Lower Keys | affected | Absent | 06/12/2021 | Vertical | Middle Side | SW | 6.4008 |
| OF_059 | Lineage 2 Lower Keys | affected | Absent | 06/12/2021 | Vertical | Middle Side | E | 5.7912 |
| OF_060 | Lineage 2 Lower Keys | affected | Present | 06/12/2021 | Vertical | Middle Side | W | 6.4008 |
| OF_061 | Lineage 2 Lower Keys | affected | Absent | 06/12/2021 | Flat | Top | S | 6.7056 |
| OF_062 | Lineage 2 Lower Keys | unaffected | Absent | 06/12/2021 | Angle | Upper Side | NW | 6.4008 |
| OF_063 | Lineage 2 Lower Keys | unaffected | Absent | 06/12/2021 | Flat | Top | NE | 5.1816 |
| OF_064 | Lineage 2 Lower Keys | unaffected | Absent | 06/12/2021 | Angle | Upper Side | E | 4.572 |
| OF_065 | Lineage 2 Lower Keys | unaffected | Absent | 06/12/2021 | Flat | Top | S | 7.3152 |
| OF_066 | Lineage 2 Lower Keys | unaffected | Absent | 06/12/2021 | Vertical | Upper Side | SW | 4.572 |
| OF_067 | Lineage 2 Lower Keys | unaffected | Absent | 06/12/2021 | Angle | Upper Side | N | 3.6576 |
| OF_068 | Lineage 2 Lower Keys | unaffected | Absent | 06/12/2021 | Vertical | Upper Side | NE | 4.572 |
| OF_069 | Lineage 2 Lower Keys | unaffected | Absent | 06/12/2021 | Flat | Top | SW | 6.4008 |
| OF_070 | O. franksii | affected | Absent | 06/13/2021 | Vertical | Upper Side | W | 8.8392 |
| OF_071 | Lineage 2 Lower Keys | affected | Present | 06/13/2021 | Vertical | Lower Side | SW | 7.62 |
| OF_072 | Lineage 2 Lower Keys | affected | Present | 06/13/2021 | Vertical | Middle Side | W | 6.4008 |
| OF_073 | Lineage 2 Lower Keys | affected | Present | 06/13/2021 | Vertical | Middle Side | NE | 8.2296 |
| OF_074 | Lineage 2 Lower Keys | affected | Present | 06/13/2021 | Angle | Upper Side | SW | 4.572 |
| OF_075 | O. franksii | affected | Present | 06/13/2021 | Vertical | Middle Side | NW | 7.62 |
| OF_076 | Lineage 2 Lower Keys | affected | Present | 06/13/2021 | Angle | Upper Side | SW | 5.1816 |
| OF_077 | O. franksii | affected | Absent | 06/13/2021 | Vertical | Middle Side | S | 10.0584 |
| OF_078 | Lineage 2 Lower Keys | affected | Present | 06/13/2021 | Flat | Lower Side | NW | 7.62 |
| OF_079 | Lineage 2 Lower Keys | affected | Present | 06/13/2021 | Vertical | Upper Side | N | 6.4008 |
| OF_080 | Lineage 2 Lower Keys | affected | Absent | 06/13/2021 | Angle | Upper Side | N | 6.4008 |
| OF_081 | Lineage 2 Lower Keys | affected | Present | 06/13/2021 | Vertical | Lower Side | SW | 7.3152 |
| OF_082 | Lineage 2 Lower Keys | affected | Absent | 06/13/2021 | Angle | Upper Side | NE | 5.7912 |
| OF_083 | Lineage 2 Lower Keys | affected | Present | 06/13/2021 | Vertical | Lower Side | E | 8.5344 |
| OF_084 | Lineage 2 Lower Keys | unaffected | Absent | 06/13/2021 | Vertical | Upper Side | SW | 7.0104 |
| OF_085 | Lineage 2 Lower Keys | unaffected | Absent | 06/13/2021 | Angle | Top | SW | 7.62 |
| OF_086 | Lineage 2 Lower Keys | unaffected | Absent | 06/13/2021 | Angle | Middle Side | W | 7.3152 |
| OF_087 | Lineage 2 Lower Keys | unaffected | Absent | 06/13/2021 | Angle | Upper Side | S | 7.9248 |
| OF_088 | Lineage 2 Lower Keys | unaffected | Absent | 06/13/2021 | Angle | Upper Side | SW | 7.0104 |
| OF_089 | Lineage 2 Lower Keys | unaffected | Absent | 06/13/2021 | Flat | Top | SE | 6.4008 |
| OF_090 | Lineage 2 Lower Keys | unaffected | Absent | 06/13/2021 | Angle | Upper Side | W | 8.8392 |
